# Supplementary material for: Marginal zinc deficiency alters the heart proteome of rats
Source: Royal Society of Chemistry journal article supplement (doi:10.1039/d2fo03815c), 2023-01-01
Supplement: d2fo03815c1.pdf [file d2fo03815c1.pdf]

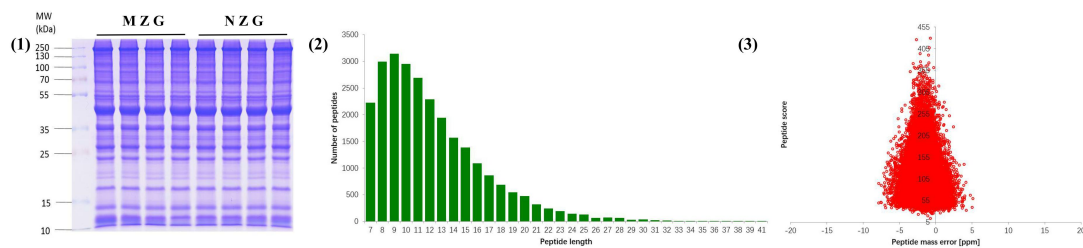

### Supplemental figure-1 Quality control validation of protein extraction and MS data.

(1) quality control of protein extraction (SDS-PAGE of coomassie brilliant blue staining), (2) mass spectrometry data validation (peptide length distribution), (3) mass spectrometry data validation (the mass errors distribution).

MZG: Marginal zinc-deficient group, NZG: Normal zinc group.

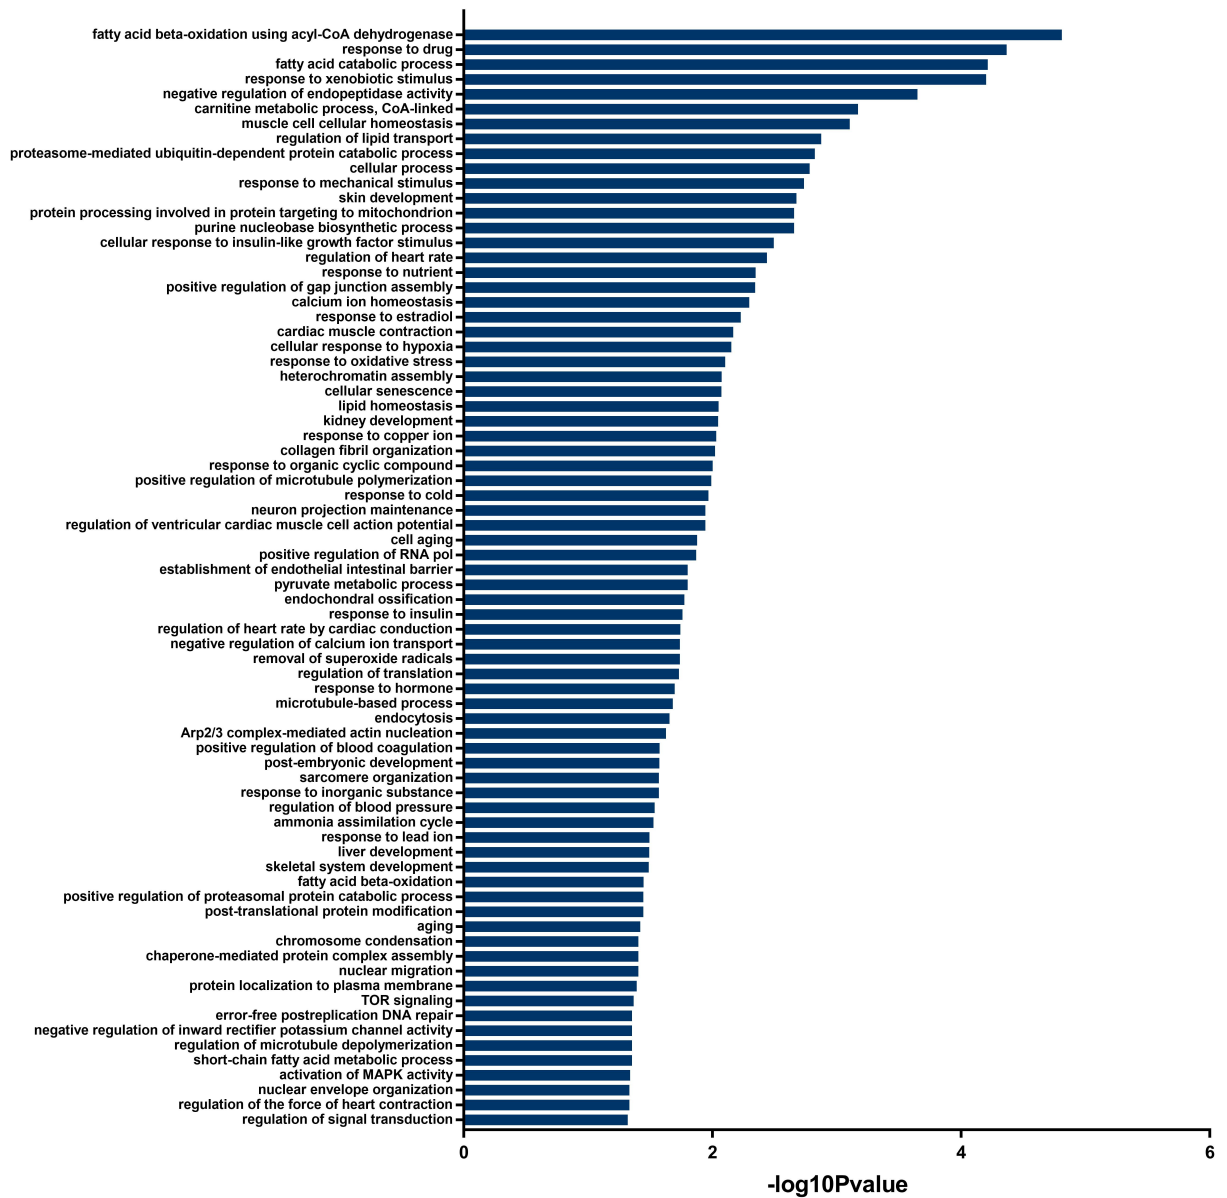

**Supplemental figure-2 GO enrichment results (biological processes) of heart proteomics.**

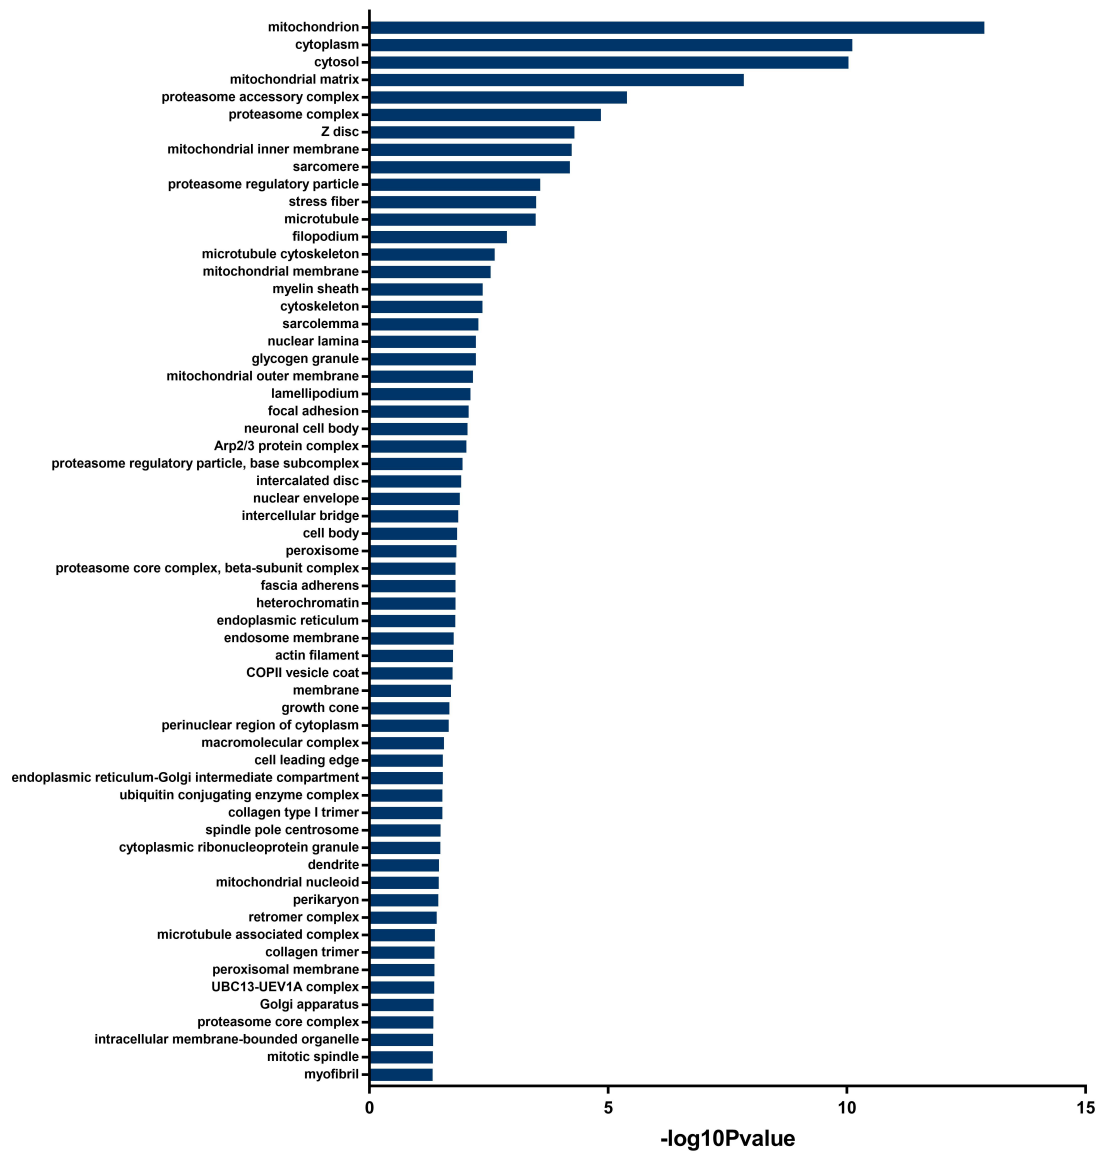

**Supplemental figure-3 GO enrichment results (cell components) of heart proteomics.**

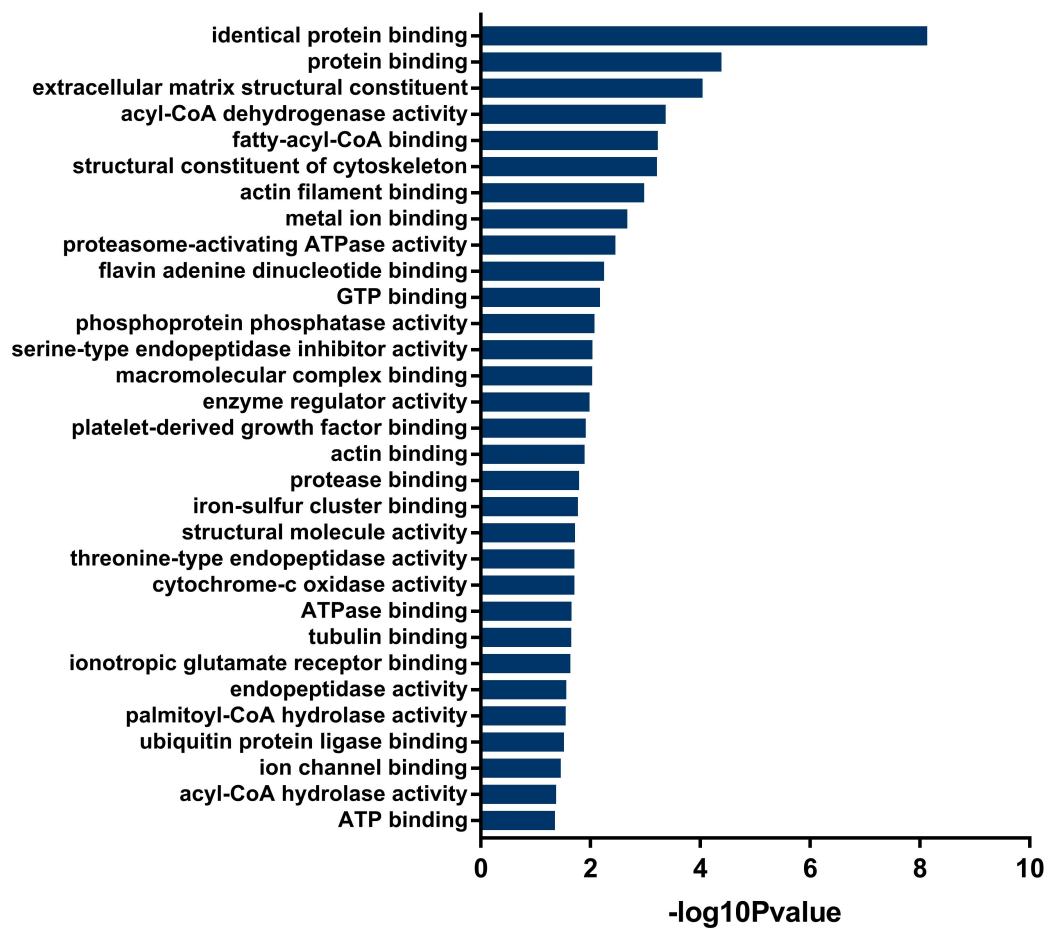

**Supplemental figure-4 GO enrichment results (molecular functions) of heart proteomics**

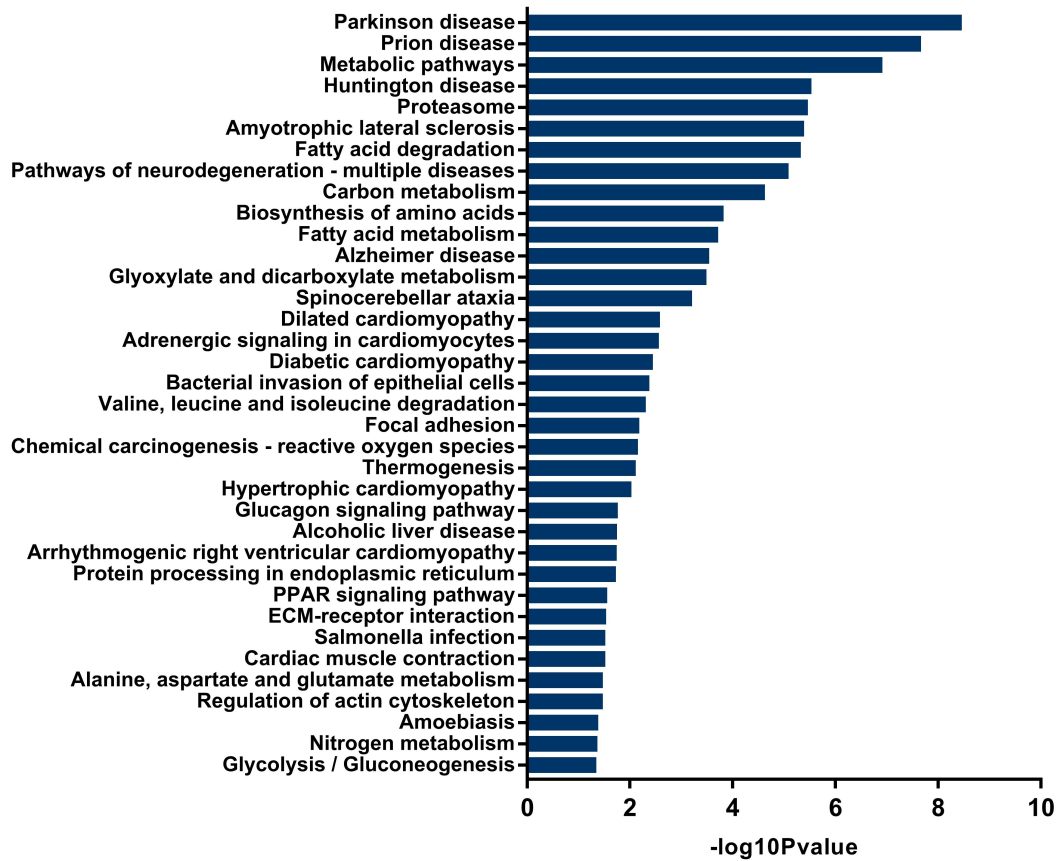

**Supplemental figure-5 Pathway enrichment results of heart proteomics**

**Supplemental Table 1. The main component of rats' diet for two groups.**

| <b>Components</b>                                    | <b>MZG</b> | <b>NZG and PZG</b> |
|------------------------------------------------------|------------|--------------------|
| Energy, kcal/kg                                      | 3766       | 3766               |
| Protein ( <b>Egg white</b> )calories accounts for, % | 17         | 17                 |
| Fat calories account for, %                          | 14         | 14                 |
| Carbohydrate calories account for, %                 | 69         | 69                 |
| protein( <b>Egg white</b> ), %                       | 16         | 16                 |
| fat, %                                               | 6          | 6                  |
| Carbohydrate, %                                      | 66         | 66                 |
| <b>Mineral content (g/kg):</b>                       |            |                    |
| Calcium carbonate                                    | 357        | 357                |
| Potassium phosphate                                  | 196        | 196                |
| Potassium citrate                                    | 70.78      | 70.78              |
| Potassium sulfate                                    | 46.6       | 46.6               |
| Magnesium oxide                                      | 24         | 24                 |
| Sodium chloride                                      | 74         | 74                 |
| Cupric carbonate                                     | 0.3        | 0.3                |
| 1%Potassium iodate                                   | 0.01       | 0.01               |
| Ferric citrate                                       | 6.06       | 6.06               |
| Manganous carbonate                                  | 0.63       | 0.63               |
| sodium carbonate                                     | 0.01025    | 0.01025            |
| <b>Zinc carbonate</b>                                | <b>0</b>   | <b>1.65</b>        |
| Chromium potassium sulfate                           | 0.275      | 0.275              |
| ammonium molybdate                                   | 0.00795    | 0.00795            |
| Boric acid                                           | 0.0815     | 0.0815             |
| Sodium fluoride                                      | 0.0635     | 0.0635             |
| Sucrose                                              | 222.676    | 221.026            |
| Total                                                | 998.4942   | 998.4942           |

---

**Vitamin content:**

|                       |      |      |
|-----------------------|------|------|
| Vitamin A, IU/g       | 4.0  | 4.0  |
| Vitamin D, IU/g       | 1.0  | 1.0  |
| Vitamin E, IU/kg      | 81.6 | 81.6 |
| Vitamin K, ppm        | 0.29 | 0.29 |
| Thiamine, ppm         | 6.1  | 6.1  |
| Riboflavin, ppm       | 6.7  | 6.7  |
| niacin, ppm           | 30   | 30   |
| Pantothenic acid, ppm | 16   | 16   |
| Folic acid, ppm       | 2.1  | 2.1  |
| Pyridoxine, ppm       | 5.8  | 5.8  |
| Biotin, ppm           | 0.2  | 0.2  |
| Vitamin B-12, mcg/kg  | 29   | 29   |
| Choline chloride, ppm | 1.25 | 1.25 |
| Ascorbic acid, ppm    | 0    | 0    |

---

Note: The background zinc concentration in diet is 10 mg/kg. The zinc concentration of MZG diet was 10 mg/kg, and the zinc concentration of NZG and PZG was 30 mg/kg. MZG, marginal zinc-deficient group; NZG, normal zinc group; PZG, paired zinc group.

**Supplemental Table 2. Peptides selected for the validation of the proteins.**

| <b>Accession</b> | <b>Protein Name</b>                                   | <b>Gene Name</b> | <b>Peptides</b>  |
|------------------|-------------------------------------------------------|------------------|------------------|
| O35115           | Four and a half LIM domains protein 2                 | Fhl2             | ENQNFCVPCYEK     |
|                  |                                                       |                  | QYALQCVQCK       |
| F1LS40           | Collagen alpha-2 chain                                | Colla2           | GEAGAAGPSGPAGPR  |
|                  |                                                       |                  | GPAGPSGPIGK      |
| P59215           | Guanine nucleotide-binding protein G(o) subunit alpha | Gnao1            | LWGDSGIQECFNR    |
|                  |                                                       |                  | IGAADYQPTEQDILR  |
| D3ZCV0           | Actinin alpha 2                                       | Actn2            | QSILAIQNEVEK     |
|                  |                                                       |                  | ETADTDTAEQVIASFR |
| P01015           | Angiotensinogen                                       | Agt              | GSYNLQDLLAQAK    |
|                  |                                                       |                  | LSTLLGAEANLGK    |
| P07632           | Superoxide dismutase [Cu-Zn]                          | Sod1             | GGNEESTK         |
|                  |                                                       |                  | LACGVIGIAQ       |
| P02454           | Collagen alpha-1 chain                                | Colla1           | GFSGLDGAK        |
|                  |                                                       |                  | GSEGPQGVR        |
| P18614           | Integrin alpha-1                                      | Itga1            | YSSTEEVLVAANK    |
|                  |                                                       |                  | SIASEPTEK        |



**Supplemental Table 3. Echocardiographic variables among three groups.**

|              | MZG          | NZG          | PZG           |
|--------------|--------------|--------------|---------------|
| IVS;d(mm)    | 1.71±0.12    | 1.70±0.13    | 1.71±0.15     |
| IVS;s(mm)    | 2.35±0.31    | 2.24±0.29    | 2.26±0.22     |
| LVID;d(mm)   | 6.68±0.68    | 7.34±0.62    | 7.24±0.73     |
| LVID;s(mm)   | 3.95±0.48    | 4.13±0.61    | 4.00±0.58     |
| LVPW;d(mm)   | 1.85±0.34    | 1.78±0.16    | 1.69±0.26     |
| LVPW;s(mm)   | 2.62±0.42    | 2.63±0.28    | 2.51±0.43     |
| EF(%)        | 70.57±2.96   | 73.11±6.84   | 74.48±5.66    |
| FS(%)        | 41.02±2.36   | 45.96±3.95   | 44.87±5.26    |
| LVM(mg)      | 817.19±91.37 | 918.77±76.79 | 869.94±122.51 |
| LV Vol;d(uL) | 232.56±48.87 | 286.04±55.55 | 278.46±65.67  |
| LV Vol;s(uL) | 69.04±17.71  | 77.61±25.98  | 71.49±24.09   |

Note: MZG, marginal zinc-deficient group; NZG, normal zinc group; PZG, paired zinc group; IVS, interventricular septum; LVID, left ventricular internal diastolic; LVPW, left ventricular posterior wall; EF, ejection fractions; FS, fractional shortening; LVM, left ventricular mass; LV Vol, left ventricular volume; d, diastole; s, systole.

**Supplemental Table 4. Quantification of relative area of Masson staining.**

|                          | MZG         | NZG         | PZG         |
|--------------------------|-------------|-------------|-------------|
| fibrotic area/total area | 2.91 ± 2.68 | 4.27 ± 1.42 | 2.43 ± 2.44 |

Note: MZG, marginal zinc-deficient group; NZG, normal zinc group; PZG, paired zinc group.
